# Supplementary material for: Granzyme A-expressing Terminal Effector T Cells Dedifferentiate into Long-lived Memory T Cells
Source: Research Square preprint supplement (doi:10.21203/rs.3.rs-10107441/v1), 2026-06-26
Supplement: Supplementary file 1 [file b128078da73272e8fb199562.docx]

**Supplemental Figures**

Granzyme A-expressing Terminal Effector T Cells Dedifferentiate into Long-lived Memory T Cells

**
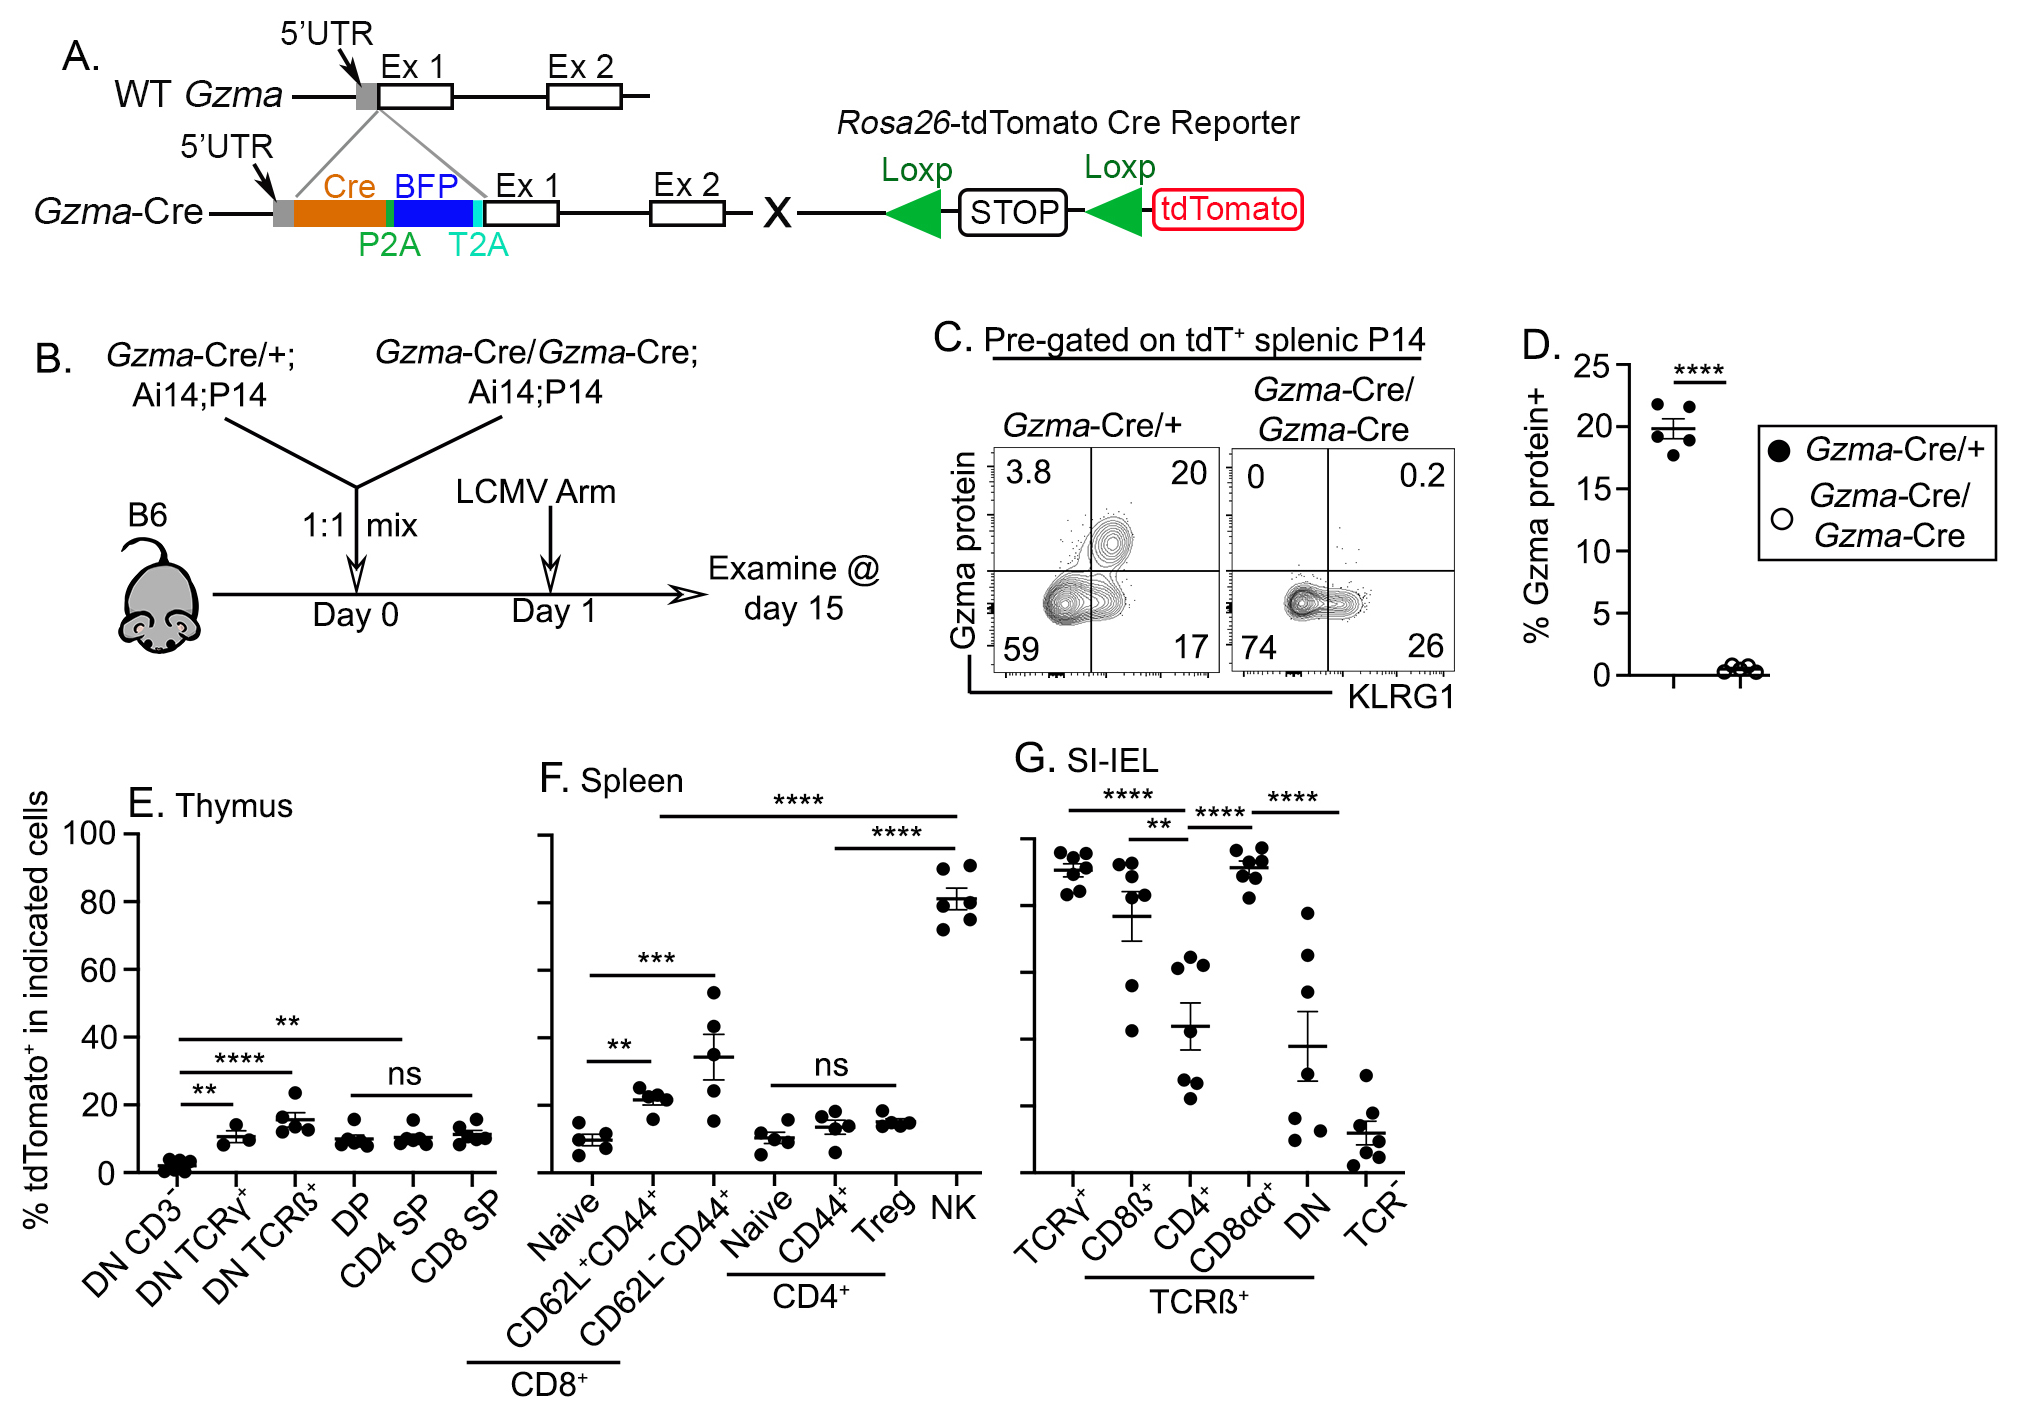
**

**Figure S1. Generation of *Gzma*-fate mapping (*Gzma*-FM) mice**. (**A**) Design of the *Gzma*-Cre allele and the breeding strategy to generate *Gzma*-FM mice. (**B**) Experimental design for (C) and (D). (**C**) and (**D**), Gzma protein expression was measured by flow cytometry in pre-gated P14 CD8+ T cells isolated from the spleen of infected mice. Two subsets of P14 T cells with different genotypes are shown, i.e., *Gzma-*Cre/+ and *Gzma-*Cre/*Gzma-*Cre. (**E-H**) Naïve *Gzma*-FM/+ mice were analyzed by flow cytometry at 8-12 weeks. The percentage of tdTomato+ cells in indicated subsets of lymphocytes isolated from (**E**) thymus, (**F**) spleen, and (**G**) small intestine intraepithelial lymphocytes (SI-IEL) is shown. Each symbol represents the results from one mouse. Pooled results from 3-4 independent experiments are shown. One-way ANOVA or t-test, ns, not significant, **, p<0.01, ***, p<0.001, and ****, p<0.0001.

**
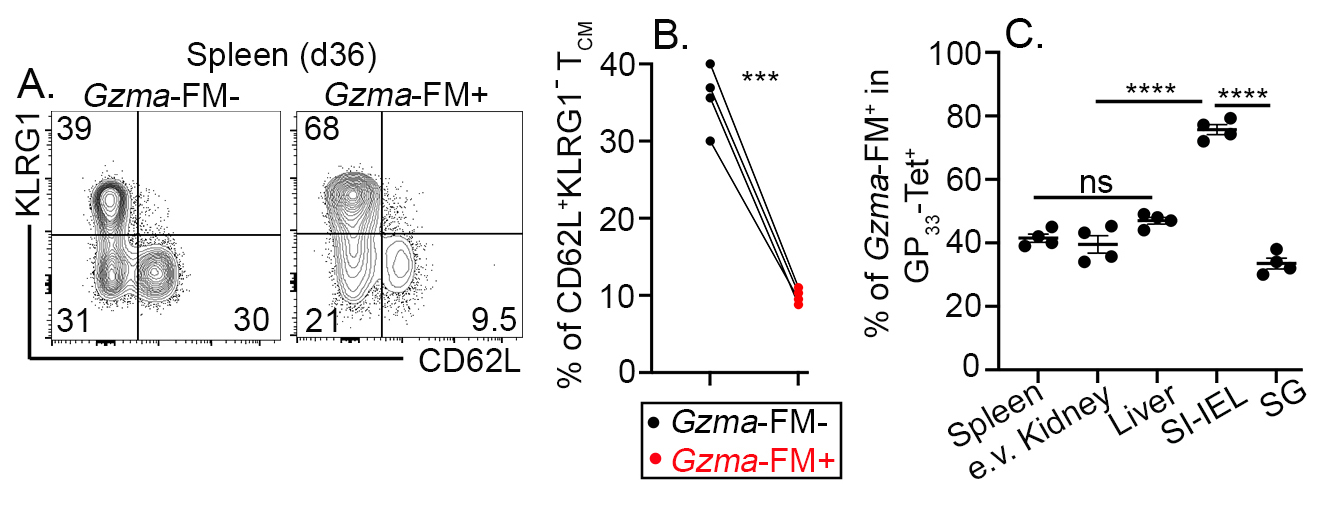
**

**Figure S2. The distribution and characterization of *Gzma*-FM+ cells in polyclonal CD8+ T cells post LCMV infection**. *Gzma*-FM mice were directly infected with LCMV Arm. Day 36 post-infection, representative FACS profiles of *Gzma*-FM- and *Gzma*-FM+ cells among pre-gated H2-Db-GP33-41 tetramer+ subsets are shown in (**A**). (**B**) The percentage of CD62L+KLRG1- TCM cells in *Gzma*-FM- and *Gzma*-FM+ H2-Db-GP33-41 tetramer+ CD8+ T cells in the spleen. (**C**) The percentage of *Gzma*-FM+ cells in H2-Db-GP33-41 tetramer+ CD8+ T cells isolated from the indicated tissues. e.v., extravascular, defined by intravascular CD8 staining *in vivo*. Each symbol in (C) and each pair of symbols in (B) represents the results from one mouse. Paired Student t-test or one-way ANOVA, ns, not significant, ***, p<0.001, and ****, p<0.0001.


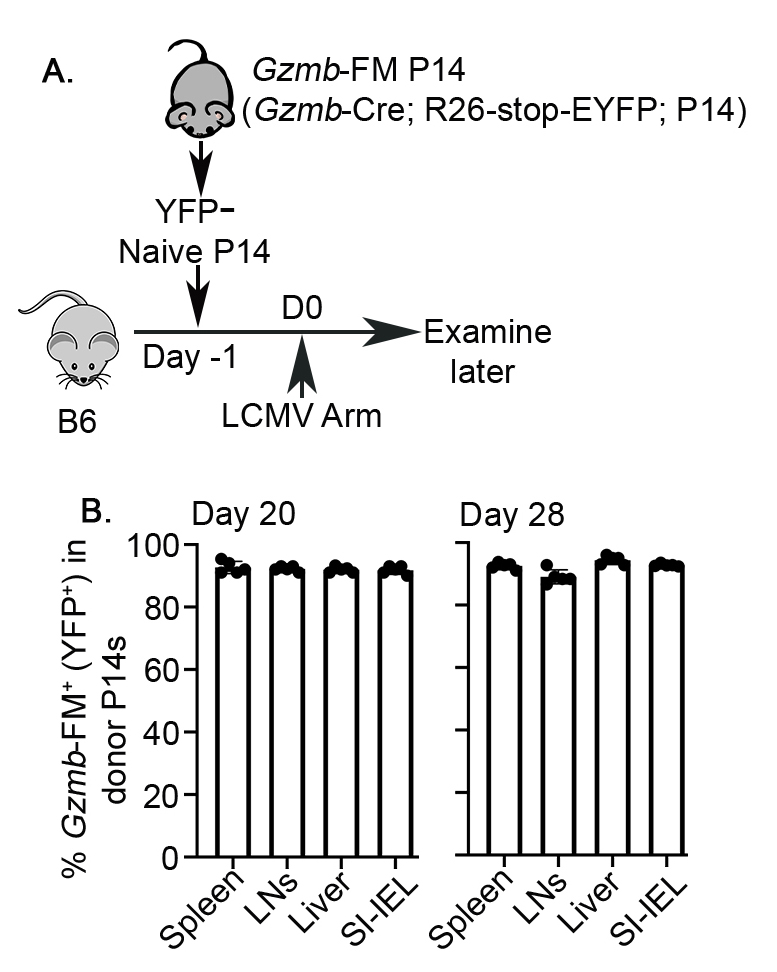


**Figure S3. *Gzmb*-FM labels activated CD8+ T cells**. (**A**) Experimental design. YFP-naïve P14 T cells were sorted from *Gzmb*-FM-P14 mice. 5,000 sorted cells were adoptively transferred into each B6 recipient, followed by LCMV Arm infection. (**B**) At day 20 (left) and day 28 (right) post-infection, the percentage of YFP+ (*Gzmb*-FM+) cells in donor P14 T cells isolated from the indicated tissues is shown. Each symbol represents the results from one B6 recipient. Pooled results from two repeats.


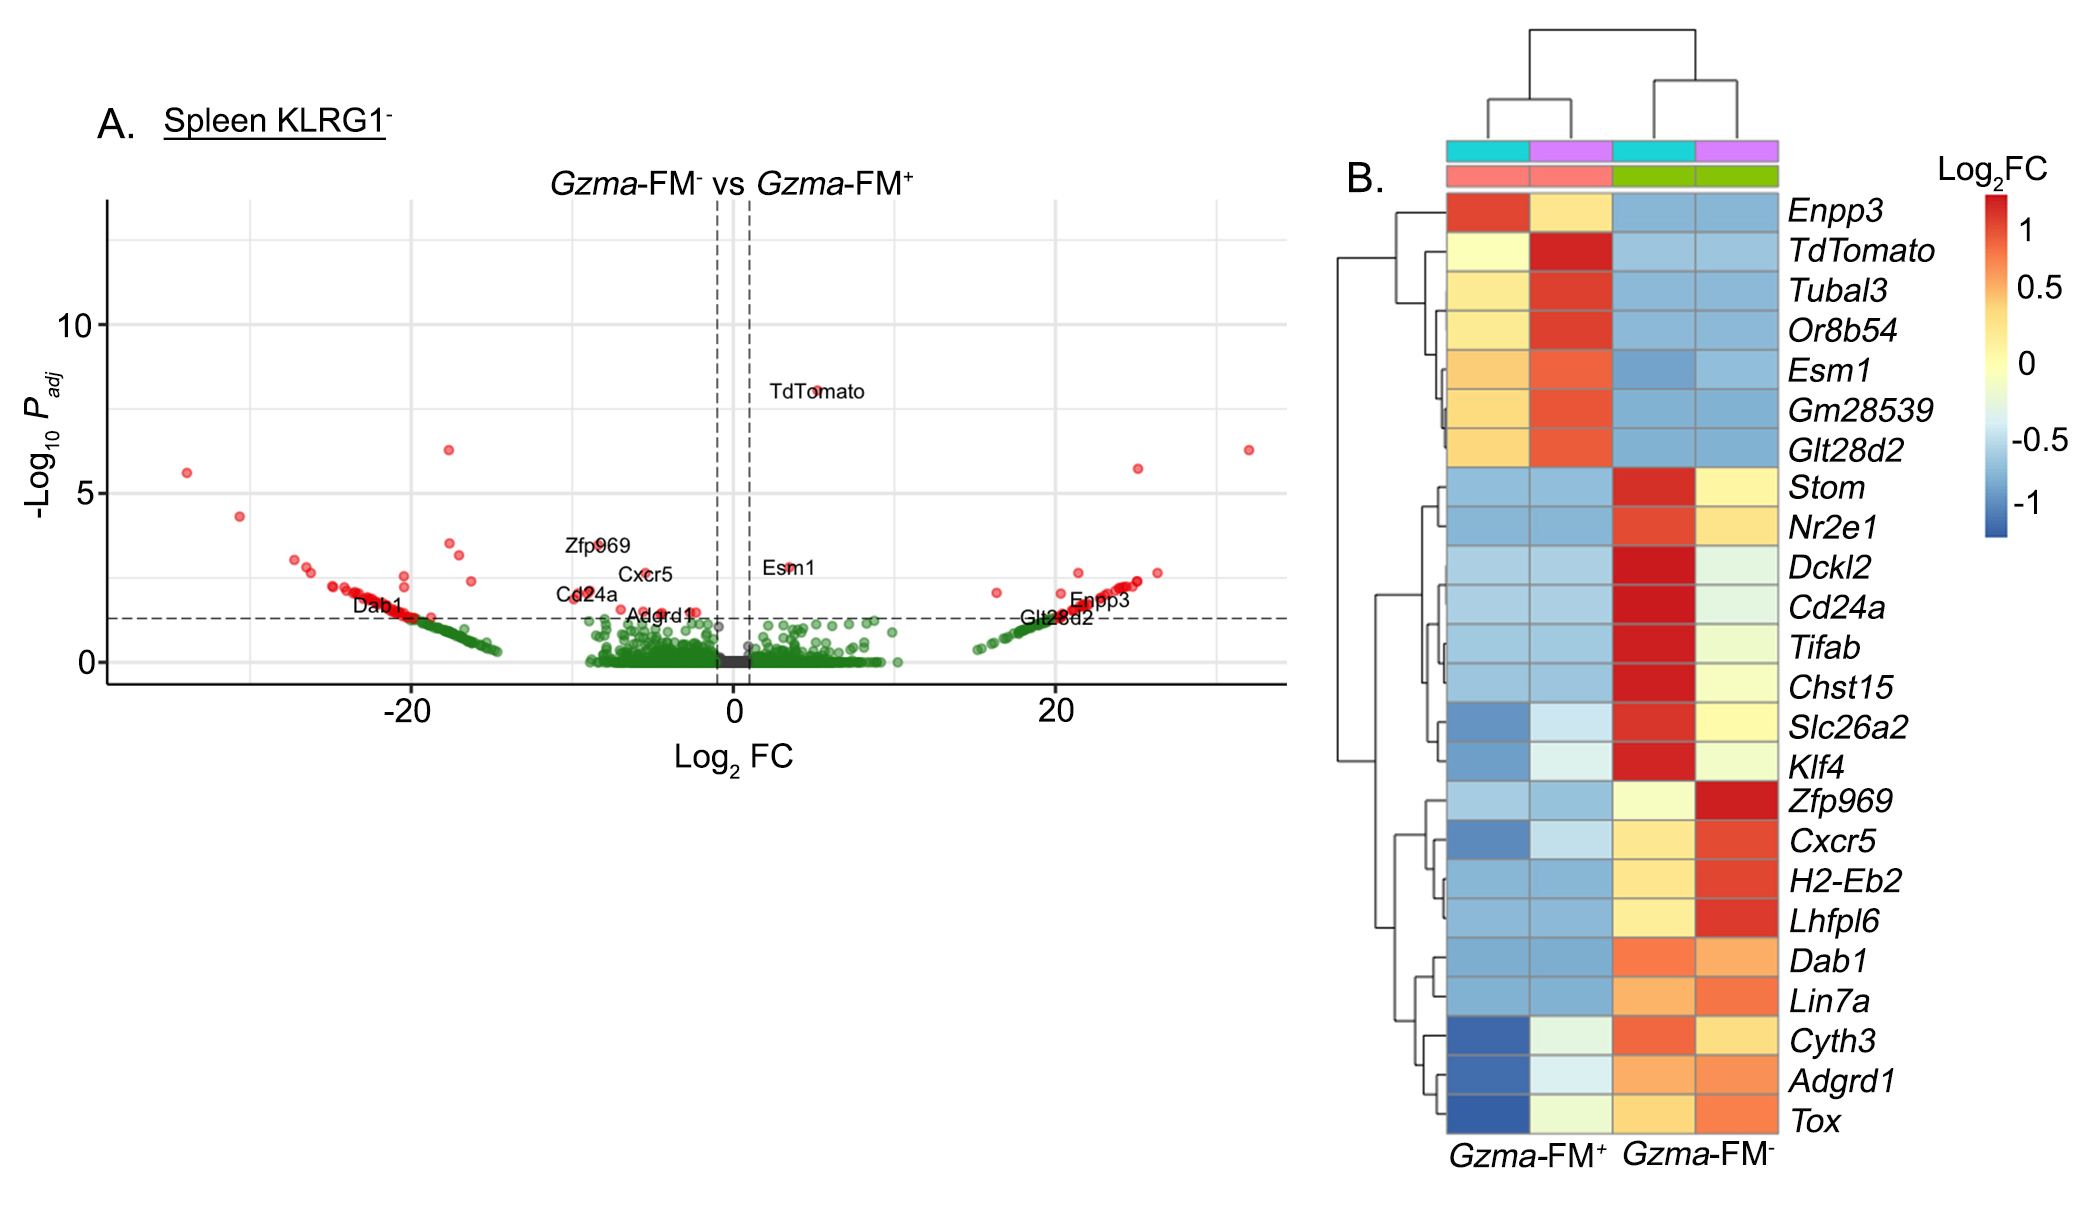


**Figure S4. Transcriptional profiles of *Gzma-*FM- and *Gzma*-FM+ memory T cells**. Similar experimental design as in Fig. 2A. Day 36 post-infection, KLRG1-*Gzma-*FM- and KLRG1-*Gzma-*FM+ P14 T cells were FACS sorted from the spleen. Sorted cells were subjected to RNA-seq analyses. (**A**), volcano plot, and (**B**), heatmap to show differentially expressed genes. Each column in (B) represents a biologically independent replicate.


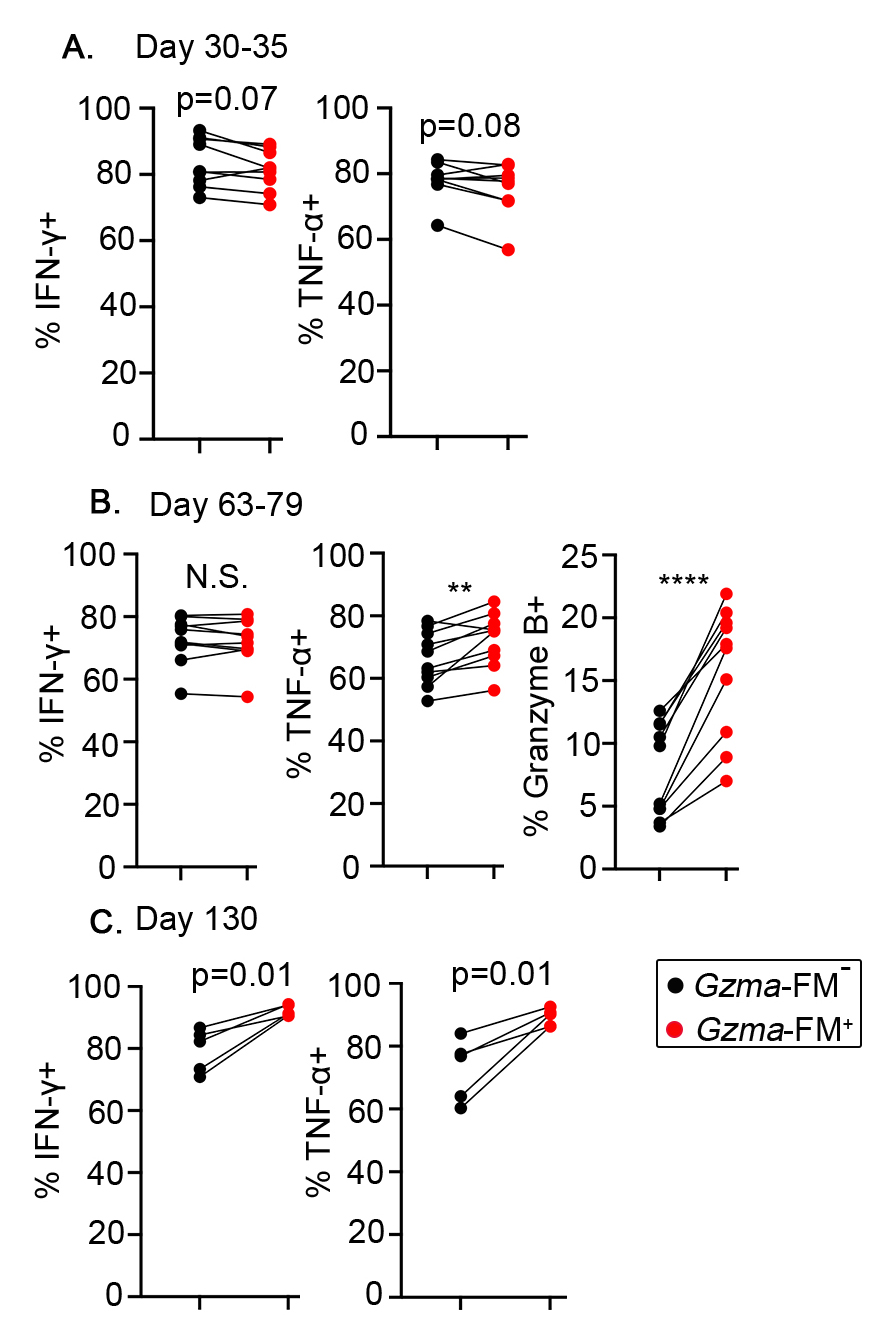


**Figure S5. Enhanced effector cytokine production in *Gzma*-FM+ long-term memory T cells**. Similar experimental design as in Fig. 2A. At (**A**) day 30-35, (**B**) day 63-79 and (**C**) day 130 post LCMV Arm infection, cytokine production from *Gzma*-FM- and *Gzma*-FM+ donor P14 memory T cells was measured by intracellular FACS staining after 4-hour *ex vivo* peptide stimulation. Each pair of symbols represents the results from one recipient. Pooled results from 3 independent repeats are shown. Paired Student t-test, N.S., not significant, **, p<0.01 and ****, p<0.0001.
